# Supplementary material for: Split-Belt Training but Not Cerebellar Anodal tDCS Improves Stability Control and Reduces Risk of Fall in Patients with Multiple Sclerosis
Source: MDPI journal article supplement (doi:10.3390/brainsci12010063), 2021-12-31
Supplement: s1 [file s1]

**Supplementary Table S1.** Clinical and demographic characteristics of patients with multiple sclerosis (PwMS). Continuous data are expressed as mean ± standard deviation and ordinal data as median [range].

| PwMS <sub>Real</sub> | Age           | Gender | T25FW (s)   | tDCS-mode | Duration of MS (y) | Disease Subtype | Current DMT | EDSS        | PwMS <sub>Sham</sub> | Age          | Gender | T25FW (s)   | tDCS-mode | Duration of MS (y) | Disease Subtype | Current DMT | EDSS      |
|----------------------|---------------|--------|-------------|-----------|--------------------|-----------------|-------------|-------------|----------------------|--------------|--------|-------------|-----------|--------------------|-----------------|-------------|-----------|
| 1                    | 32            | F      | 8.46        | Real      | 5                  | RRMS            | -           | 3.5         | 1                    | 56           | F      | 6.05        | Sham      | 3                  |                 | TR          | 2         |
| 2                    | 50            | M      | 5.67        | Real      | 9                  | PPMS            | FN; OR      | 3           | 2                    | 49           | F      | 8.24        | Sham      | 30                 | PPMS            | NAT         | 3.5       |
| 3                    | 43            | M      | 15.01       | Real      | 15                 | SPMS            | -           | 6.5         | 3                    | 39           | F      | 5.12        | Sham      | 8                  |                 | DMF         | 4.5       |
| 4                    | 53            | M      | 5.73        | Real      | 23                 | RRMS            | IF          | 3           | 4                    | 36           | F      | 5.46        | Sham      | 16                 | RRMS            | OR          | 3         |
| 5                    | 48            | M      | 6.85        | Real      | 19                 | RRMS            | DMF         | 4.5         | 5                    | 44           | F      | 5.67        | Sham      | 12                 | SPMS            | FN          | 3.5       |
| 6                    | 51            | M      | 7.19        | Real      | 8                  | PPMS            | -           | 3.5         | 6                    | 35           | M      | 5.87        | Sham      | 4                  | RRMS            |             | 2         |
| 7                    | 31            | M      | 5.47        | Real      | 16                 | RRMS            | -           | 4.5         | 7                    | 61           | F      | 4.04        | Sham      | 1                  | RRMS            |             | 3         |
| 8                    | 63            | M      | 17.09       | Real      | 16                 | PPMS            | -           | 6           | 8                    | 53           | M      | 9.84        | Sham      | 0                  | PPMS            | OR          | 5         |
| 9                    | 59            | F      | 5.67        | Real      | 19                 | RRMS            | TR          | 3           | 9                    | 42           | M      | 4.97        | Sham      | 8                  | PPMS            |             | 4         |
| 10                   | 64            | F      | 10.79       | Real      | 30                 | SPMS            | GA          | 4.5         | 10                   | 54           | F      | 6.67        | Sham      | 18                 | SPMS            | FM          | 5         |
| 11                   | 53            | F      | 5.77        | Real      | 23                 | RRMS            | IF          | 3           |                      |              |        |             |           |                    |                 |             |           |
| 12                   | 51            | F      | 10.80       | Real      | 13                 | SPMS            | -           | 6           |                      |              |        |             |           |                    |                 |             |           |
| Mean ± SD            | 49.83 ± 10.46 |        | 8.71 ± 3.94 |           | 16.33 ± 7.10       |                 |             | 4.0 [3-6.5] |                      | 46.90 ± 9.00 |        | 6.19 ± 1.70 |           | 10.00 ± 9.30       |                 |             | 3.5 [2-5] |

Abbreviations: F = female; M = male; RRMS = relapsing-remitting multiple sclerosis; SPMS = secondary progressive multiple sclerosis; PPMS = primary progressive multiple sclerosis; EDSS = Expanded Disability Status Scale; T25FW= timed 25-foot walking test; R= right-handed, L = left-handed; MS= multiple sclerosis; DMT = disease-modifying therapy; IF = interferon beta; FN = fingolimod; GA = glatirameracetate; DMF = dimethyl fumarate; FM = fampridine; NAT = natalizumab; OR= ocrelizumab; TR = teriflunomide.
