# Supplementary figures and images for: Split-Belt Training but Not Cerebellar Anodal tDCS Improves Stability Control and Reduces Risk of Fall in Patients with Multiple Sclerosis
Source: MDPI journal article supplement (doi:10.3390/brainsci12010063), 2021-12-31

**Supplementary Figure S1.** Recruitment process of the study.

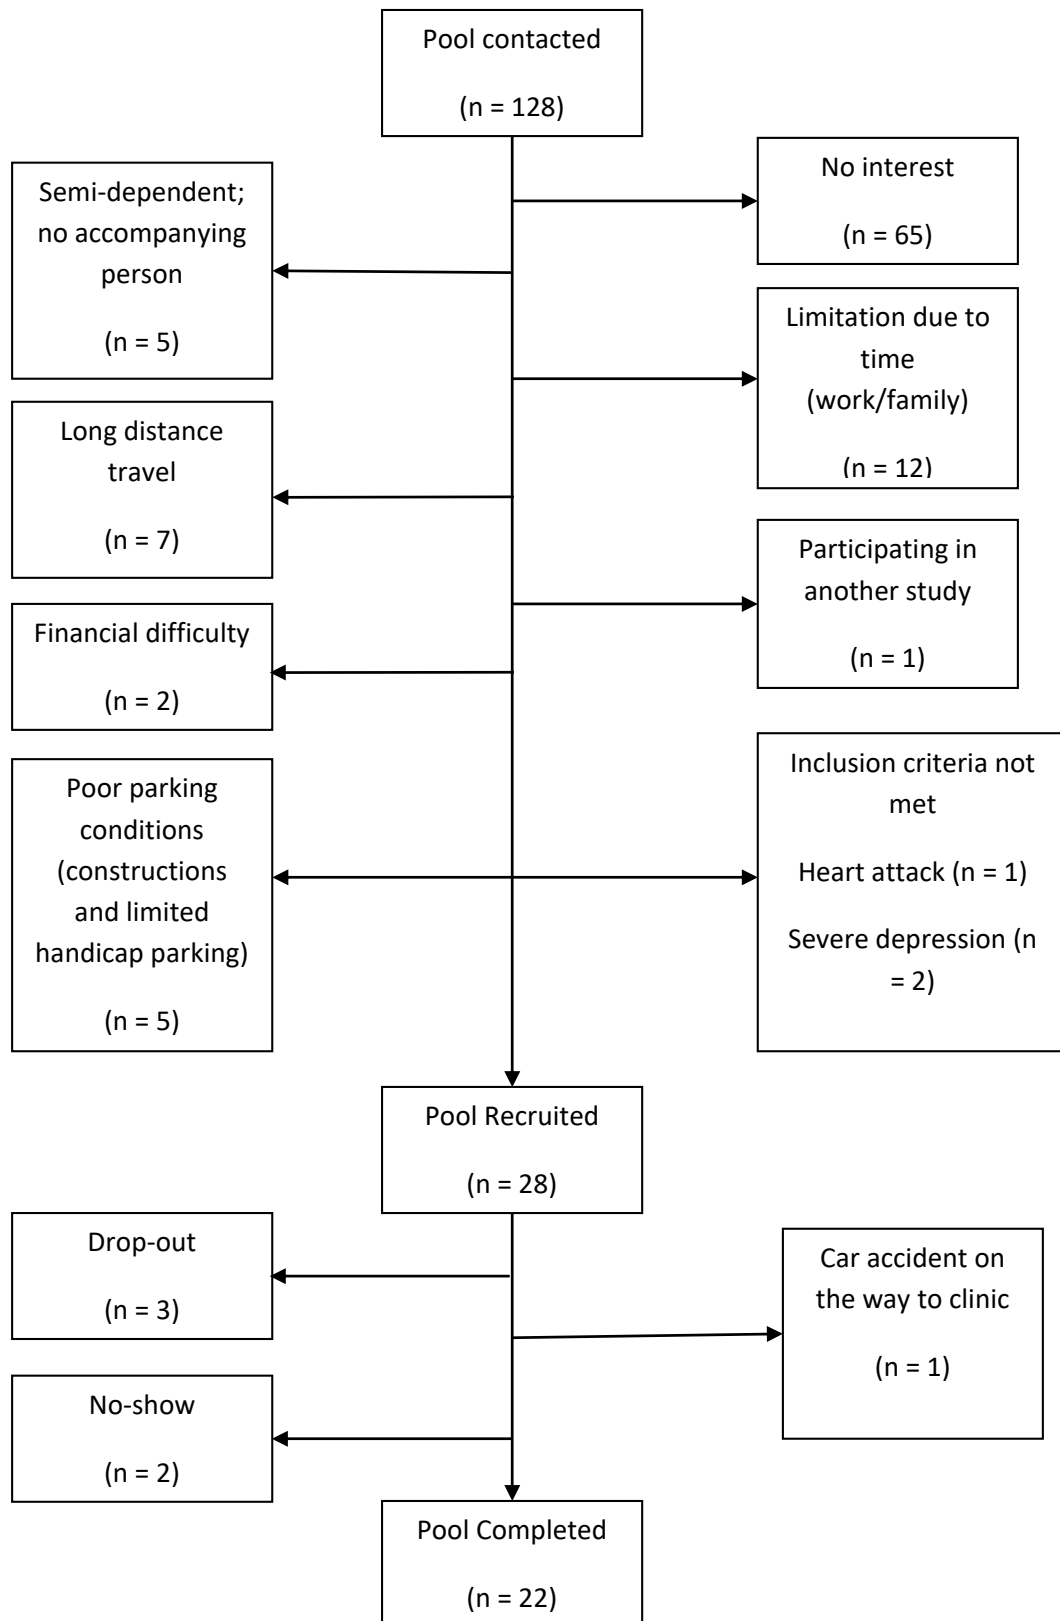

Supplement: s1 [file s1]
